# Supplementary material for: A minimally invasive bronchoscopic approach for direct delivery to murine airways and application to models of pulmonary infection
Source: PubMed Central journal article supplement — Lab Anim. 2023 Jun 29;57(6):611–22. doi: 10.1177/00236772231175553 (PMC10693731; doi:10.1177/00236772231175553), 2023-06-29
Supplement: sj-pdf-1-lan-10.1177_00236772231175553.pdf [file sj-pdf-1-lan-10.1177_00236772231175553.pdf]

## Supplementary tables for:

### **A minimally invasive bronchoscopic approach for direct delivery to murine airways and application to models of pulmonary infection.**

K. Schelde<sup>1</sup>, J. Rosenjack<sup>1</sup>, C. Sonneborn<sup>1</sup>, A. Jafri<sup>1</sup>, M. Kavran<sup>2</sup>, S. Brumbaugh<sup>3</sup>, A. Rietsch<sup>4</sup>, R.J. Darrah<sup>1</sup>, C.A. Hodges<sup>1</sup>, C.A. Flask<sup>2</sup>, T.J. Kelley<sup>1</sup>, M.L. Drumm<sup>1</sup>

Affiliations: <sup>1</sup>Department of Genetics and Genome Sciences, Case Western Reserve University, <sup>2</sup>Department. of Radiology, University Hospitals Cleveland Medical Center, <sup>3</sup>Cleveland Institute of Art, <sup>4</sup>Department of Molecular Biology and Microbiology, Case Western Reserve University

*Sup. table 1.* Difference in mean weight change and standard deviation for the groups being compared. Numbers are used for the power calculations in Table 1.

| <b><u>Comparing CFU doses</u></b> |                   | <b><u>Bronchoscope</u></b> |                 | <b><u>Surgery</u></b>     |                 |
|-----------------------------------|-------------------|----------------------------|-----------------|---------------------------|-----------------|
| <b>Inoculum 1</b>                 | <b>Inoculum 2</b> | <b>Difference in mean</b>  | <b>Std.dev.</b> | <b>Difference in mean</b> | <b>Std.dev.</b> |
| 25,000                            | 50,000            | 4.7                        | 4.9             | 8.1                       | 8.5             |
| 50,000                            | 100,000           | 5.9                        | 6.5             | 5.9                       | 9.5             |
| 25,000                            | 100,000           | 10.6                       | 7.1             | 14.0                      | 7.8             |

*Sup. table 2.* Power calculations to detect significant changes in weight for studies involving different bacterial inocula administered by bronchoscopic or surgical procedures. Three different levels of power (70%, 80% and 90%) were estimated. The difference in mean weight change for each procedure was used together with standard deviation to calculate the

number of mice needed to perform the analysis of the studies at a significance level of 0.05.

\*For the surgical procedure, mean and std. dev. values represent the linear imputed values to compensate for the number of mice that died before day 3. For the bronchoscopic procedure, no mice died before day 3, so no linear imputation was done. Because of bacterial dose-dependent mortality observed for mice undergoing the surgical procedure, the number of mice needed has been mortality-corrected, hence the number of mice needed for inoculation at day 0 is higher than the number needed for the analysis.

| <u>Comparing CFU doses</u> |                   | <u>Bronchoscope</u>    |                | <u>Surgery*</u>        |                |
|----------------------------|-------------------|------------------------|----------------|------------------------|----------------|
| <u>Inoculum 1</u>          | <u>Inoculum 2</u> | <u>Mean difference</u> | <u>Std.dev</u> | <u>Mean difference</u> | <u>Std.dev</u> |
| 25,000                     | 50,000            | 4.7                    | 4.9            | <b>6.6</b>             | <b>7.9</b>     |
| 50,000                     | 100,000           | 5.9                    | 6.5            | <b>6.4</b>             | <b>8.9</b>     |
| 25,000                     | 100,000           | 10.6                   | 7.1            | <b>13.0</b>            | <b>7.9</b>     |

| <u>Power</u> | <u>Comparing CFU doses</u> |                   | <u>Bronchoscope</u> | <u>Needed sample size for analysis</u> | <u>Surgery*</u>                        |                   |
|--------------|----------------------------|-------------------|---------------------|----------------------------------------|----------------------------------------|-------------------|
|              | <u>Inoculum 1</u>          | <u>Inoculum 2</u> |                     |                                        | <u>Mortality-corrected sample size</u> |                   |
|              |                            |                   |                     |                                        | <u>Inoculum 1</u>                      | <u>Inoculum 2</u> |
| 70%          | 25,000                     | 50,000            | <b>15</b>           | 19                                     | <b>22</b>                              | <b>24</b>         |
|              | 50,000                     | 100,000           | <b>16</b>           | 25                                     | <b>31</b>                              | <b>38</b>         |
|              | 25,000                     | 100,000           | <b>7</b>            | 6                                      | <b>7</b>                               | <b>9</b>          |
| 80%          | 25,000                     | 50,000            | <b>19</b>           | 24                                     | <b>27</b>                              | <b>30</b>         |
|              | 50,000                     | 100,000           | <b>20</b>           | 32                                     | <b>39</b>                              | <b>48</b>         |
|              | 25,000                     | 100,000           | <b>9</b>            | 7                                      | <b>8</b>                               | <b>11</b>         |
| 90%          | 25,000                     | 50,000            | <b>25</b>           | 32                                     | <b>36</b>                              | <b>39</b>         |
|              | 50,000                     | 100,000           | <b>27</b>           | 42                                     | <b>51</b>                              | <b>63</b>         |
|              | 25,000                     | 100,000           | <b>11</b>           | 9                                      | <b>10</b>                              | <b>14</b>         |
